# Supplementary material
Source: Springer Nature journal article supplement (https://www.springermedizin.de/resource/supplementary/12943_2014_1418_MOESM2_ESM.pdf/9552930)

**A**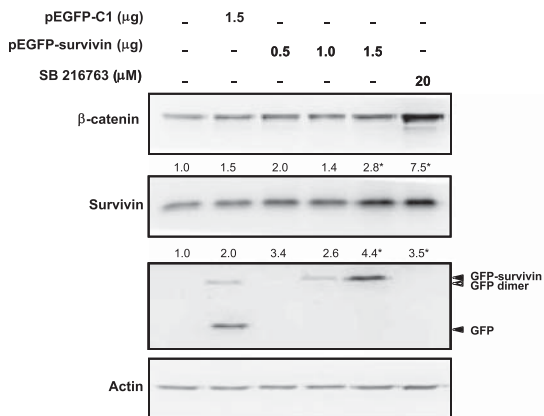**C**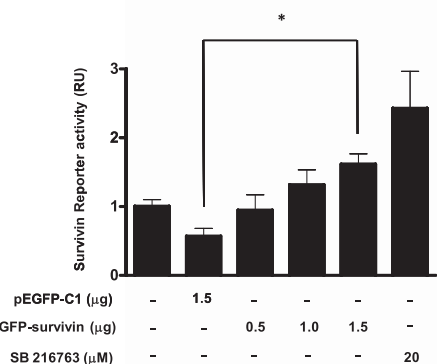**E**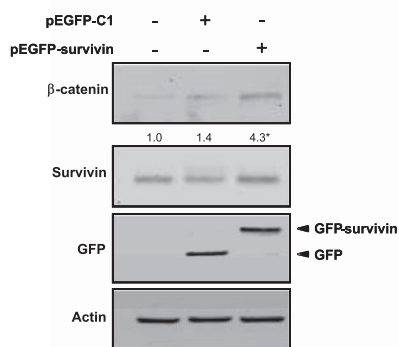**G**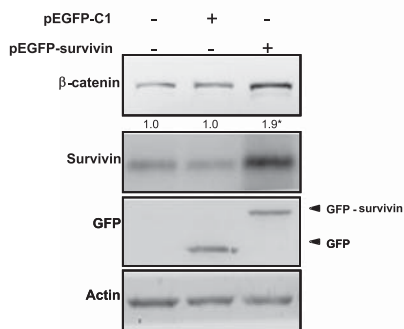**B**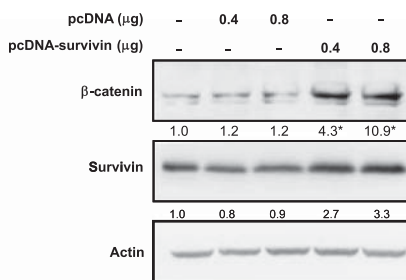**D**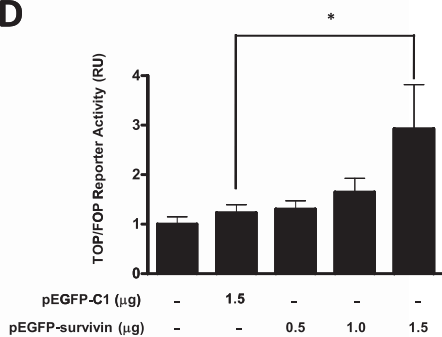**F**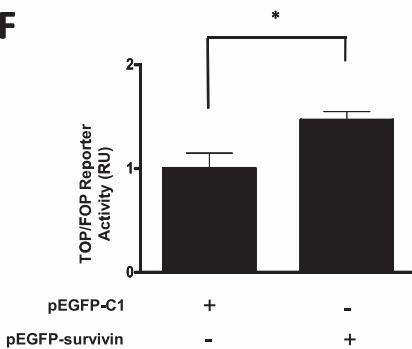**H**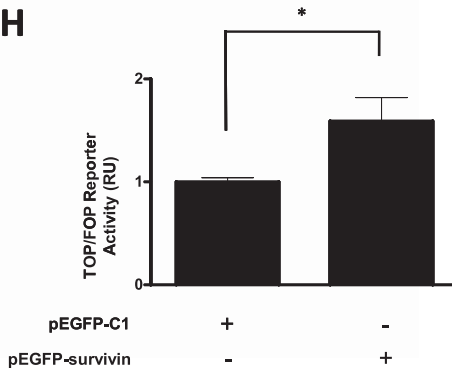

Supplement: MOESM2 [file 9552930]
